# Supplementary material
Source: MDPI journal article supplement (https://www.mdpi.com/2073-4395/13/7/1876)
Supplement: s1 [file s1]

**Table S1** Shannon and Faith's PD indices before and after transplanting in different microhabitats. All values were an average from all replicates  $\pm$  standard deviations. Black asterisks represent significant differences based on the ANOVA test. Values with the same letters within a column did not significantly differ based on the Tukey's multiple comparisons test.

| Alpha diversity index                    | IS                 | IG                  | TS                  | TG                  |
|------------------------------------------|--------------------|---------------------|---------------------|---------------------|
| <b>Bacteria (Mean<math>\pm</math>SD)</b> |                    |                     |                     |                     |
| Shannon*                                 | 7.28 $\pm$ 0.35a   | 7.27 $\pm$ 0.23a    | 5.84 $\pm$ 0.63b    | 6.74 $\pm$ 0.24a    |
| Faith's PD*                              | 250.44 $\pm$ 8.28a | 258.93 $\pm$ 15.15a | 222.14 $\pm$ 16.77b | 244.66 $\pm$ 11.35a |
| <b>Fungi (Mean<math>\pm</math>SD)</b>    |                    |                     |                     |                     |
| Shannon                                  | 4.54 $\pm$ 0.18a   | 4.32 $\pm$ 0.66a    | 4.41 $\pm$ 0.42a    | 4.53 $\pm$ 0.35a    |
| Faith's PD                               | 172.97 $\pm$ 11.9a | 186.5 $\pm$ 29.51a  | 172.64 $\pm$ 39.73a | 175.08 $\pm$ 14.97a |

**Table S2** The relative abundance of top 10 class level before and after transplanting in different microhabitats. All values were an average from all replicates  $\pm$  standard deviations. Black asterisks represent significant differences based on the ANOVA test. Values with the same letters within a column did not significantly differ based on the Tukey's multiple comparisons test.

|                                         | IS                  | IG                 | TS                 | TG                 |
|-----------------------------------------|---------------------|--------------------|--------------------|--------------------|
| Class level of Bacteria (Mean $\pm$ SD) |                     |                    |                    |                    |
| Alphaproteobacteria                     | 16.66 $\pm$ 4.35a   | 18.19 $\pm$ 2.88a  | 17.68 $\pm$ 3.52a  | 22.06 $\pm$ 3.06a  |
| <b>Gammaproteobacteria *</b>            | 12.07 $\pm$ 6.05b   | 6.39 $\pm$ 1.31b   | 30.71 $\pm$ 9.36a  | 10.47 $\pm$ 3.88b  |
| Actinobacteria                          | 14.75 $\pm$ 7.14a   | 15.58 $\pm$ 4.53a  | 13.71 $\pm$ 4.88a  | 10.09 $\pm$ 1.71a  |
| <b>Unassigned *</b>                     | 9.04 $\pm$ 3.52ab   | 11.11 $\pm$ 3.78ab | 6.86 $\pm$ 1.89b   | 13.41 $\pm$ 3.36a  |
| <b>Gemmatimonadetes *</b>               | 4.25 $\pm$ 0.75b    | 10.58 $\pm$ 2.14a  | 5.52 $\pm$ 2.74b   | 11.32 $\pm$ 2.89a  |
| <b>Betaproteobacteria *</b>             | 6.97 $\pm$ 2.41a    | 7.22 $\pm$ 0.87a   | 3.96 $\pm$ 0.96b   | 7.37 $\pm$ 0.44a   |
| Acidobacteria_Gp1                       | 1.87 $\pm$ 1.72a    | 4.19 $\pm$ 1.86a   | 3.01 $\pm$ 0.81a   | 4.64 $\pm$ 1.7a    |
| <b>Sphingobacteriia *</b>               | 1.96 $\pm$ 0.44b    | 1.47 $\pm$ 0.34b   | 4.06 $\pm$ 0.53a   | 2.29 $\pm$ 1.14b   |
| <b>Acidobacteria_Gp6 *</b>              | 5.37 $\pm$ 3.03a    | 2.83 $\pm$ 0.95b   | 0.47 $\pm$ 0.17b   | 1.09 $\pm$ 0.37ab  |
| <b>Deltaproteobacteria *</b>            | 4.63 $\pm$ 2.18a    | 2.64 $\pm$ 0.98ab  | 0.72 $\pm$ 0.37b   | 1.36 $\pm$ 0.49b   |
| <b>LowAbundance *</b>                   | 22.43 $\pm$ 3.57a   | 19.79 $\pm$ 1.93ab | 13.31 $\pm$ 2.32c  | 15.89 $\pm$ 4.56bc |
| Class level of Fungi (Mean $\pm$ SD)    |                     |                    |                    |                    |
| <b>Sordariomycetes *</b>                | 48.24 $\pm$ 11.61a  | 23.62 $\pm$ 14.12b | 44.8 $\pm$ 4.91b   | 42.99 $\pm$ 8.8b   |
| <b>Unassigned *</b>                     | 16.61 $\pm$ 10.31ab | 23.42 $\pm$ 5.53a  | 13.17 $\pm$ 1.14ab | 9.2 $\pm$ 2.55b    |
| Agaricomycetes                          | 4.26 $\pm$ 2.55a    | 17.6 $\pm$ 15.36a  | 8.3 $\pm$ 7.48a    | 11.57 $\pm$ 13.06a |
| <b>Mortierellomycetes *</b>             | 7.13 $\pm$ 6.34ab   | 15.21 $\pm$ 5.49a  | 3.1 $\pm$ 2.17b    | 8.84 $\pm$ 5.41ab  |
| Leotiomycetes                           | 7.08 $\pm$ 1.74a    | 7.94 $\pm$ 4.01a   | 6.47 $\pm$ 3.12a   | 5.67 $\pm$ 4.27a   |
| Eurotiomycetes                          | 6.84 $\pm$ 5.57a    | 2.72 $\pm$ 0.92a   | 10.05 $\pm$ 5.75a  | 5.05 $\pm$ 3.78a   |

|                 |            |            |            |            |
|-----------------|------------|------------|------------|------------|
| Dothideomycetes | 4.31±1.26a | 3.01±2.04a | 6.01±3.03a | 5.48±2.07a |
| Tremellomycetes | 2.46±1.11a | 2.67±0.82a | 4.91±2.5a  | 5.1±4.73a  |
| Pezizomycetes   | 0.96±0.53a | 1.08±0.7a  | 1.32±1.71a | 2.2±1.85a  |
| Spizellomycetes | 1.02±2.03a | 0.03±0.03a | 0.98±1.48a | 2.86±3.37a |
| LowAbundance    | 1.08±0.26a | 2.71±2.55a | 0.89±0.87a | 1.04±0.73a |

**Table S3** Properties of the microbiota association networks before and after transplanting in different microhabitats.

| Properties of the networks                  | IS    | IG    | TS   | TG   |
|---------------------------------------------|-------|-------|------|------|
| <b>Bacterial community</b>                  |       |       |      |      |
| Nodes <sup>a</sup>                          | 211   | 360   | 285  | 361  |
| Edges <sup>b</sup>                          | 1565  | 1268  | 1359 | 1624 |
| Average degree distribution <sup>c</sup>    | 14.83 | 7.04  | 9.54 | 8.99 |
| Average clustering coefficient <sup>d</sup> | 0.33  | 0.51  | 0.39 | 0.47 |
| Average path length <sup>e</sup>            | 4.85  | 12.25 | 5.68 | 8.26 |
| Modularity <sup>f</sup>                     | 0.67  | 0.84  | 0.69 | 0.81 |
| Modules                                     | 14    | 23    | 24   | 19   |
| <b>Fungal community</b>                     |       |       |      |      |
| Nodes <sup>a</sup>                          | 163   | 140   | 179  | 171  |
| Edges <sup>b</sup>                          | 762   | 560   | 421  | 490  |
| Average degree distribution <sup>c</sup>    | 9.35  | 8.00  | 4.70 | 5.73 |
| Average clustering coefficient <sup>d</sup> | 0.37  | 0.34  | 0.31 | 0.34 |
| Average path length <sup>e</sup>            | 4.01  | 4.02  | 3.80 | 2.18 |
| Modularity <sup>f</sup>                     | 0.61  | 0.73  | 0.84 | 0.77 |
| Modules                                     | 20    | 14    | 24   | 19   |

<sup>a</sup> Number of AVSs with the Spearman correlation  $|r| > 0.8$  and P-value  $< 0.05$ . <sup>b</sup> Number of significant (P-value  $< 0.05$ ) correlations between nodes. <sup>c</sup> The larger the average distribution, the more complex the network distribution. <sup>d</sup> How nodes were embedded in their neighborhood, and the degree to which nodes tend to cluster together. <sup>e</sup> The capability of the nodes to form highly connected communities. <sup>f</sup> Modularity  $> 0.4$  suggested that the network has a modular structure.

**Table S4** Different types of ASVs, species classification, and average relative abundance in different groups. The bold numbers represented the relative abundance of ASV within the top 30 of the group.

| No.      | Name     | Contribution<br>rate (%) <sup>a</sup> | MeanDecrease<br>Accuracy <sup>b</sup> | Type               | Species classification |                        | Average relative abundance |              |              |              |
|----------|----------|---------------------------------------|---------------------------------------|--------------------|------------------------|------------------------|----------------------------|--------------|--------------|--------------|
|          |          |                                       |                                       |                    | Class                  | Genus                  | IS                         | IG           | TS           | TG           |
| Bacteria |          |                                       |                                       |                    |                        |                        |                            |              |              |              |
| 1        | bASV_57  | -                                     | 2.519                                 | Important<br>ASVs  | Gammaproteobacteria    | <i>Rhodanobacter</i>   | 0.000                      | 0.014        | <b>0.449</b> | 0.054        |
| 2        | bASV_75  | -                                     | 2.438                                 |                    | Gemmatimonadetes       | <i>Gemmatimonas</i>    | 0.015                      | <b>0.302</b> | 0.003        | 0.007        |
| 3        | bASV_16  | -                                     | 2.110                                 |                    | Gammaproteobacteria    | <i>Mizugakiibacter</i> | 0.001                      | 0.086        | <b>1.172</b> | <b>0.370</b> |
| 4        | bASV_2   | 1.88                                  | -                                     |                    | Gammaproteobacteria    | <i>Mizugakiibacter</i> | 0.023                      | <b>0.661</b> | <b>7.222</b> | <b>1.399</b> |
| 5        | bASV_9   | 0.33                                  | -                                     | Functional<br>ASVs | Alphaproteobacteria    | Unassigned             | <b>0.350</b>               | 0.141        | <b>0.789</b> | <b>0.776</b> |
| 6        | bASV_40  | 0.20                                  | -                                     |                    | Gemmatimonadetes       | <i>Gemmatimonas</i>    | 0.001                      | 0.105        | 0.087        | <b>0.773</b> |
| 7        | bASV_44  | 0.20                                  | -                                     |                    | Alphaproteobacteria    | Unassigned             | <b>0.160</b>               | 0.074        | <b>0.708</b> | 0.134        |
| 8        | bASV_22  | 0.18                                  | -                                     |                    | Ktedonobacteria        | Unassigned             | 0.002                      | <b>0.422</b> | <b>0.557</b> | <b>0.444</b> |
| 9        | bASV_90  | 0.16                                  | -                                     |                    | Sphingobacteriia       | <i>Chitinophaga</i>    | 0.000                      | 0.013        | 0.128        | <b>0.548</b> |
| 10       | bASV_46  | 0.14                                  | -                                     |                    | Sphingobacteriia       | Unassigned             | 0.003                      | 0.075        | <b>0.473</b> | 0.151        |
| 11       | bASV_87  | 0.11                                  | -                                     |                    | Alphaproteobacteria    | <i>Devosia</i>         | 0.087                      | 0.148        | 0.221        | <b>0.409</b> |
| 12       | bASV_230 | 0.09                                  | -                                     |                    | Alphaproteobacteria    | <i>Lacibacterium</i>   | <b>0.304</b>               | 0.067        | 0.041        | 0.016        |
| 13       | bASV_672 | 0.07                                  | -                                     |                    | Acidobacteria_Gp16     | <i>Gp16</i>            | <b>0.224</b>               | 0.229        | 0.064        | 0.091        |
| 14       | bASV_123 | 0.07                                  | -                                     |                    | Alphaproteobacteria    | <i>Pseudolabrys</i>    | <b>0.231</b>               | 0.113        | 0.039        | 0.065        |
| 15       | bASV_200 | 0.05                                  | -                                     |                    | Betaproteobacteria     | <i>Nitrosospira</i>    | <b>0.201</b>               | 0.018        | 0.002        | 0.002        |
| 16       | bASV_159 | 0.05                                  | -                                     |                    | Acidobacteria_Gp1      | <i>Gp1</i>             | <b>0.175</b>               | 0.028        | 0.005        | 0.001        |
| 17       | bASV_11  | 0.36                                  | 1.449                                 |                    | Gammaproteobacteria    | <i>Rhodanobacter</i>   | 0.009                      | 0.044        | <b>1.114</b> | <b>0.403</b> |
| 18       | bASV_10  | 0.29                                  | 2.354                                 |                    | Acidobacteria_Gp1      | <i>Acidobacterium</i>  | 0.004                      | 0.069        | <b>0.952</b> | <b>0.363</b> |

|              |          |      |       |                                 |                         |                        |              |              |              |              |
|--------------|----------|------|-------|---------------------------------|-------------------------|------------------------|--------------|--------------|--------------|--------------|
| 19           | bASV_35  | 0.15 | 1.175 | Important<br>functional<br>ASVs | Alphaproteobacteria     | Unassigned             | 0.109        | 0.037        | <b>0.611</b> | 0.121        |
| 20           | bASV_31  | 0.15 | 1.401 |                                 | Alphaproteobacteria     | <i>Bradyrhizobium</i>  | <b>0.414</b> | <b>0.270</b> | 0.056        | 0.040        |
| <b>Fungi</b> |          |      |       |                                 |                         |                        |              |              |              |              |
| 1            | fASV_1   | -    | 3.354 | Important<br>ASVs               | Sordariomycetes         | <i>Fusarium</i>        | <b>7.308</b> | 0.432        | <b>8.566</b> | <b>3.489</b> |
| 2            | fASV_6   | -    | 2.188 |                                 | Sordariomycetes         | Unassigned             | 0.128        | 0.158        | <b>6.608</b> | 0.157        |
| 3            | fASV_32  | -    | 2.405 |                                 | Unassigned              | Unassigned             | 0.005        | 0.011        | 0.101        | <b>2.218</b> |
| 4            | fASV_45  | -    | 2.273 |                                 | Unassigned              | Unassigned             | 0.310        | <b>1.828</b> | 0.055        | 0.007        |
| 5            | fASV_28  | -    | 3.166 |                                 | Sordariomycetes         | <i>Staphylotrichum</i> | <b>1.189</b> | 0.208        | <b>0.677</b> | 0.098        |
| 6            | fASV_65  | -    | 2.173 |                                 | Eurotiomycetes          | Unassigned             | <b>0.977</b> | 0.011        | 0.000        | 0.003        |
| 7            | fASV_70  | -    | 3.275 |                                 | Mortierellomycetes      | <i>Mortierella</i>     | 0.000        | <b>0.874</b> | 0.000        | 0.003        |
| 8            | fASV_121 | -    | 2.147 |                                 | Mortierellomycetes      | <i>Mortierella</i>     | 0.057        | 0.005        | 0.030        | <b>0.758</b> |
| 9            | fASV_78  | -    | 3.004 |                                 | Sordariomycetes         | Unassigned             | 0.018        | 0.000        | 0.004        | <b>0.738</b> |
| 10           | fASV_111 | -    | 2.294 |                                 | Unassigned              | Unassigned             | 0.023        | 0.003        | <b>0.620</b> | 0.016        |
| 11           | fASV_98  | -    | 2.237 | Leotiomycetes                   | <i>Pseudogymnoascus</i> | 0.000                  | 0.002        | 0.000        | 0.657        |              |
| 12           | fASV_13  | 1.02 | -     | Tremellomycetes                 | <i>Guehomyces</i>       | 0.541                  | <b>0.634</b> | <b>1.987</b> | <b>2.846</b> |              |
| 13           | fASV_14  | 0.91 | -     | Mortierellomycetes              | <i>Mortierella</i>      | <b>2.143</b>           | <b>1.747</b> | 0.229        | 0.054        |              |
| 14           | fASV_20  | 0.68 | -     | Sordariomycetes                 | Unassigned              | <b>1.289</b>           | 0.011        | <b>1.345</b> | <b>1.394</b> |              |
| 15           | fASV_10  | 0.90 | -     | Unassigned                      | Unassigned              | <b>3.421</b>           | 0.377        | 0.103        | 0.044        |              |
| 16           | fASV_39  | 0.69 | -     | functional<br>ASVs              | Sordariomycetes         | <i>Gibberella</i>      | 0.036        | 0.075        | <b>0.871</b> | <b>1.919</b> |
| 17           | fASV_42  | 0.64 | -     |                                 | Dothideomycetes         | <i>Alternaria</i>      | 0.097        | 0.025        | <b>1.416</b> | <b>1.220</b> |
| 18           | fASV_34  | 0.41 | -     |                                 | Mortierellomycetes      | <i>Mortierella</i>     | <b>0.941</b> | <b>1.063</b> | 0.413        | 0.331        |
| 19           | fASV_84  | 0.33 | -     |                                 | Tremellomycetes         | <i>Solicoccozyma</i>   | 0.292        | 0.084        | <b>1.110</b> | 0.502        |
| 20           | fASV_69  | 0.27 | -     |                                 | Tremellomycetes         | <i>Solicoccozyma</i>   | 0.496        | <b>0.847</b> | 0.304        | 0.181        |
| 21           | fASV_40  | 0.38 | -     |                                 | Sordariomycetes         | <i>Cephalotrichum</i>  | 0.278        | <b>1.240</b> | 0.035        | 0.023        |

|    |          |      |       |                                 |                    |                       |              |              |              |              |
|----|----------|------|-------|---------------------------------|--------------------|-----------------------|--------------|--------------|--------------|--------------|
| 22 | fASV_85  | 0.24 | -     |                                 | Sordariomycetes    | <i>Dactylonectria</i> | 0.043        | <b>0.908</b> | 0.009        | 0.004        |
| 23 | fASV_2   | 2.37 | 2.982 |                                 | Unassigned         | Unassigned            | <b>4.150</b> | <b>8.774</b> | <b>4.187</b> | <b>0.798</b> |
| 24 | fASV_31  | 0.49 | 2.301 | Important<br>Functional<br>ASVs | Sordariomycetes    | <i>Fusarium</i>       | <b>0.804</b> | 0.208        | <b>1.510</b> | <b>1.070</b> |
| 25 | fASV_18  | 0.40 | 1.412 |                                 | Unassigned         | <i>Unassigned</i>     | 0.055        | 0.031        | <b>1.109</b> | 0.580        |
| 26 | fASV_52  | 0.36 | 2.383 |                                 | Leotiomycetes      | <i>Geomyces</i>       | 0.208        | 0.074        | <b>1.055</b> | 0.596        |
| 27 | fASV_113 | 0.31 | 2.522 |                                 | Mortierellomycetes | <i>Mortierella</i>    | 0.091        | <b>1.174</b> | 0.031        | 0.046        |
| 28 | fASV_44  | 0.31 | 2.288 |                                 | Sordariomycetes    | <i>Unassigned</i>     | <b>0.841</b> | 0.023        | 0.360        | 0.577        |

<sup>a</sup> Contribution rate of ASVs that significantly contribute to community differences using SIMPER's algorithm. <sup>b</sup> The mean decrease accuracy of feature importance ASVs obtained through the random forest algorithm.
